# Supplementary material for: The effect of (NH 4 ) 2 SO 4 on the freezing properties of non-mineral dust ice-nucleating substances of atmospheric relevance
Source: Copernicus journal article supplement (doi:10.5194/acp-21-14631-2021), 2021-10-04
Supplement: Supplementary file 1 [file acp-21-14631-2021-supplement.pdf]

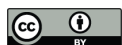

*Supplement of*

## **The effect of $(\text{NH}_4)_2\text{SO}_4$ on the freezing properties of non-mineral dust ice-nucleating substances of atmospheric relevance**

**Soleil E. Worthy et al.**

*Correspondence to:* Allan K. Bertram ([bertram@chem.ubc.ca](mailto:bertram@chem.ubc.ca))

The copyright of individual parts of the supplement might differ from the article licence.

## Supplementary Information

Table 1. Comparison of studies on the effect of dilute ( $\leq 0.1$  M)  $(\text{NH}_4)_2\text{SO}_4$  on the freezing properties of non-mineral INS. In this table,  $\Delta T_{50}$  is the change in median freezing temperature with addition of  $(\text{NH}_4)_2\text{SO}_4$ ,  $\Delta T_{90}$  is the change in the temperature at which 90% of the sample droplets were frozen with addition of  $(\text{NH}_4)_2\text{SO}_4$ ,  $\Delta T_{onset}$  is the change in the onset

5 freezing temperature with addition of  $(\text{NH}_4)_2\text{SO}_4$ , and  $n_m$  is the number of ice nucleating active sites per gram of material.

| Material            | Study                     | Freezing temperature range | $[(\text{NH}_4)_2\text{SO}_4]$ | Weight % of material | Estimated mass of material per droplet  | Observations                                                   |
|---------------------|---------------------------|----------------------------|--------------------------------|----------------------|-----------------------------------------|----------------------------------------------------------------|
| Snomax              | This study                | -5 to 0 °C                 | 0.05 M                         | 0.05 wt %            | $1 \times 10^{-6}$ g                    | $\Delta T_{50} \approx 0$ °C<br>No significant change in $n_m$ |
|                     | Koop and Zobrist, (2009)  | -15 to -5 °C               | 0 to 0.1 M                     | ~ 0.4 wt%            | $\sim 2 \times 10^{-14}$ g <sup>a</sup> | $\Delta T_{onset} \approx 0$ °C                                |
| Humic acid          | This study                | -25 to -15 °C              | 0.05 M                         | 0.05 wt %            | $1 \times 10^{-6}$ g                    | $\Delta T_{50} \approx 0$ °C<br>No significant change in $n_m$ |
|                     | Whale et al., (2018)      | -25 to -10 °C              | 0.015 M                        | 1 wt %               | $1 \times 10^{-5}$ g                    | $\Delta T_{50} \approx 0$ °C                                   |
| Leaf derived nuclei | Reischel and Vali, (1975) | -10 to -5 °C               | 0.01 to 1 M                    | 0.05 wt%             | $1 \times 10^{-5}$ g                    | $\Delta T_{90} \approx 0$ °C                                   |

<sup>a</sup>Calculated using the reported median droplet diameter of 2.4  $\mu\text{m}$  (Koop and Zobrist, 2009)

10

15

Table 2. Comparison of studies on the effect of dilute ( $\leq 0.1$  M)  $(\text{NH}_4)_2\text{SO}_4$  on the freezing properties of mineral dust INS. In this table,  $\Delta T_{50}$  is the change in median freezing temperature with addition of  $(\text{NH}_4)_2\text{SO}_4$ ,  $\Delta T_{onset}$  is the change in the onset freezing temperature with addition of  $(\text{NH}_4)_2\text{SO}_4$ ,  $n_m$  is the number of ice nucleating active sites per gram of material, and  $n_s$  is the number of ice nucleating active sites per surface area of material.

| Material        | Study                 | Freezing temperature range | $[(\text{NH}_4)_2\text{SO}_4]$           | Weight % of material | Estimated mass of material per droplet    | Observations                                                                      |
|-----------------|-----------------------|----------------------------|------------------------------------------|----------------------|-------------------------------------------|-----------------------------------------------------------------------------------|
| K-feldspar      | This study            | -15 to -5 °C               | 0.05 M                                   | 0.05 wt %            | $1 \times 10^{-6}$ g                      | $\Delta T_{50} \approx +3$ °C<br>$n_m$ increased by a factor of ~10               |
|                 | Whale et al., (2018)  | -20 to -5 °C               | $1.5 \times 10^{-4}$ to 0.015 M          | 0.1 wt %             | $1 \times 10^{-6}$ g                      | $\Delta T_{50} \approx +1.5$ to +3 °C<br>$n_s$ increased by a factor of ~5 to ~15 |
|                 | Kumar et al., (2018)  | -35 to -20 °C              | $\sim 9 \times 10^{-6}$ to $\sim 0.1$ M  | 2 wt %               | $\sim 2 \times 10^{-11}$ g <sup>a</sup>   | $\Delta T_{onset} \approx +1$ to +4.5 °C                                          |
| ATD             | This study            | -20 to -10 °C              | 0.05 M                                   | 0.05 wt %            | $1 \times 10^{-6}$ g                      | $\Delta T_{50} \approx +5.5$ °C<br>$n_m$ increased by a factor of ~20             |
|                 | Whale et al., (2018)  | -20 to -5 °C               | 0.015 M                                  | 0.1 wt %             | $1 \times 10^{-6}$ g                      | $\Delta T_{50} \approx 0$ °C<br>No significant change in $n_s$                    |
| Kaolinite       | This study            | -25 to -10 °C              | 0.05 M                                   | 0.5 wt %             | $1 \times 10^{-5}$ g                      | $\Delta T_{50} \approx +8$ °C<br>$n_m$ increased by a factor of ~30               |
|                 | Kumar et al., (2019b) | -35 to -25 °C              | $\sim 8 \times 10^{-4}$ to $\sim 0.08$ M | 5 wt %               | $\sim 4.5 \times 10^{-11}$ g <sup>a</sup> | $\Delta T_{onset} \approx +2$ to +3 °C                                            |
| Montmorillonite | This study            | -20 to -5 °C               | 0.05 M                                   | 0.5 wt %             | $1 \times 10^{-5}$ g                      | $\Delta T_{50} \approx +5.5$ °C<br>$n_m$ increased by a factor of ~10             |

<sup>a</sup>Calculated using an estimated droplet diameter of 12  $\mu\text{m}$  (Kumar et al., 2018, 2019b)
